# Supplementary material
Source: PubMed Central journal article supplement (PMC3716840)
Supplement: NIHMS482967-supplement-726_2013_1509_MOESM1_ESM.pdf [file NIHMS482967-supplement-726_2013_1509_MOESM1_ESM.pdf]

## Supplementary information

The following sequences were used in the different phylogenies.

(*Homo sapiens*: *H. sapiens*, *Macaca mulatta*: *M. mulatta*, *Rattus norvegicus*: *R. norvegicus*, *Mus musculus*: *M. musculus*, *Bos taurus*: *B. taurus*, *Monodelphis domestica*: *M. domestica*, *Gallus gallus*: *G. gallus*, *Xenopus tropicalis*: *X. tropicalis*, *Danio rerio*: *D. rerio*, *Branchiostoma floridae*: *B. floridae*, *Drosophila melanogaster*: *D. melanogaster*, *Caenorhabditis elegans*: *C. elegans*, *Saccharomyces cerevisiae*: *S. cerevisiae*, *Monosiga brevicollis*: *M. brevicollis*, *Zea mays*: *Z. mays*, and *Chlamydomonas reinhardtii*: *C. reinhardtii*).

### AADC

*Homo sapiens* AADC\_HS NP\_000781.1

*Macaca mulatta* AADC\_mam XP\_001082132.1

*Rattus norvegicus* AADC\_RN NP\_036677.1

*Mus musculus* AADC\_mum NP\_057881.1

*Bos taurus* AADC\_BT NP\_776332.1

*Monodelphis domestica* AADC\_MD XP\_001379620.2

*Gallus gallus* AADC\_GG XP\_419032.3

*Xenopus tropicalis* AADC\_XT NP\_001011289.1

*Danio rerio* AADC\_DR NP\_998507.1

*Branchiostoma floridae* Hyp1\_BF XP\_002588857.1

*Branchiostoma floridae* Hyp2\_BF XP\_002586977.1

*Branchiostoma floridae* Hyp3\_BF XP\_002588644.1

*Drosophila melanogaster* DDC\_DM NP\_724164.1

*Drosophila melanogaster* TDC2\_DM NP\_724489.1

*Bos taurus* HDC\_BT NP\_001019722.1

*Monodelphis domestica* HDC\_MD XP\_001380521.1

*Rattus norvegicus* HDC\_RN NP\_058712.2

*Homo sapiens* HDC\_HS NP\_002103.2  
*Macaca mulatta* HDC\_mam XP\_001114184.1  
*Mus musculus* HDC\_mum NP\_032256.3  
*Gallus gallus* HDC\_GG XP\_413833.1  
*Branchiostoma floridae* Hyp4\_BF XP\_002597913.1  
*Drosophila melanogaster* HDC\_DM NP\_523679.2  
*Xenopus tropicalis* HDCL\_XT XP\_002939672.1  
*Drosophila melanogaster* AMDR\_DM NP\_476592.1  
*Drosophila melanogaster* TDC1\_DM NP\_610226.2  
*Danio rerio* HDC\_DR NP\_001096063.1  
*Macaca mulatta* HDC2\_mam XP\_002804814.1  
*Chlamydomonas reinhardtii* AADC\_CR XP\_001690025.1  
*Zea mays* Hyp1\_ZM NP\_001169175.1  
*Zea mays* Hyp2\_ZM NP\_001146372.1  
*Zea mays* HYP3\_ZM NP\_001152297.1  
*Zea mays* Hyp3\_ZM NP\_001142212.1  
*Zea mays* T/DDC1\_ZM NP\_001147982.1  
*Caenorhabditis elegans* TDC-1\_CE NP\_495744.1  
*Caenorhabditis elegans* BAS-1\_CE NP\_001021150.1  
*Caenorhabditis elegans* BASL-1\_CE NP\_498210.1  
*Caenorhabditis elegans* HDL-1\_CE NP\_502265.2

## **AANAT**

*Homo sapiens* SNAT NP\_001079.1  
*Macaca mulatta* SNAT NP\_001040592.1  
*Mus musculus* SNAT NP\_033721.1

*Bos taurus* SNAT NP\_803475.1  
*Bos taurus* AANAT\_L XP\_876019.2  
*Monodelphis domestica* SNAT\_L XP\_001377164.2  
*Xenopus tropicalis* SNAT\_L XP\_002935979.1  
*Gallus gallus* SNAT NP\_990489.1  
*Danio rerio* SNAT NP\_956998.1  
*Danio rerio* aanat NP\_571486.1

## **ASMT**

*Homo sapiens* HIMT NP\_004034.2  
*Macaca mulatta* HIMT NP\_001028112.1  
*Gallus gallus* HIMT NP\_990674.1  
*Bos taurus* HIMT NP\_803459.1  
*Danio rerio* ASMT NP\_001103947.1  
*Danio rerio* HIMT NP\_001108381.1  
*Rattus norvegicus* ASMT NP\_653360.2  
*Mus musculus* ASMT NP\_001186141.1  
*Xenopus tropicalis* ASMT NP\_001011409.1  
*Homo sapiens* ASMT\_L NP\_004183.2  
*Monodelphis domestica* ASMT\_L XP\_001364243.1  
*Monodelphis domestica* HIMT\_L XP\_001363839.2  
*Danio rerio* ASMT\_L NP\_998676.1  
*Gallus gallus* HYP XP\_001231914.1  
*Xenopus tropicalis* ASMT\_L NP\_001016011.1

*Chlamydomonas REINHARDTII* HIMT\_L XP\_001695687.1

*Bos taurus* ASMT\_L1 NP\_001030230.1

*Bos taurus* ASMT\_L2 XP\_002698545.1

## **DBH**

*Homo sapiens* DBH NP\_000778.3

*Macaca mulatta* DBH XP\_001100196.2

*Bos taurus* DBH NP\_851338.1

*Mus musculus* DBH NP\_620392.2

*Rattus norvegicus* DBH NP\_037290.2

*Monodelphis domestica* DBH\_L XP\_001371885.1

*Gallus gallus* S\_DBMO XP\_415429.2

*Xenopus tropicalis* DBH\_L XP\_002942324.1

*Danio rerio* DBH NP\_001103164.1

*Branchiostoma floridae* HYP1 XP\_002596363.1

*Drosophila melanogaster* TBH NP\_788884.1

*Caenorhabditis elegans* TBH NP\_510562.2

*Rattus norvegicus* MO\_DL1 XP\_001054130.2

*Branchiostoma floridae* HYP2 XP\_002606079.1

*Branchiostoma floridae* HYP3 XP\_002606078.1

*Mus musculus* MO\_DL1 NP\_067484.2

*Danio rerio* MO\_DL1 NP\_001038671.1

*Gallus gallus* MO\_DL1 NP\_989955.1

*Branchiostoma floridae* HYP4 XP\_002592059.1

*Branchiostoma floridae* HYP5 XP\_002604328.1

*Macaca mulatta* MODL1L XP\_001103212.1

*Homo sapiens* MO\_DL1 NP\_056344.2

*Bos taurus* MO\_DL1 XP\_869777.2

*Branchiostoma floridae* HYP6 XP\_002606416.1

## **MAOA**

*Homo sapiens* AOA NP\_000231.1

*Bos taurus* AOA NP\_851357.2

*Rattus norvegicus* AOA NP\_387502.1

*Mus musculus* AOA NP\_776101.3

*Monodelphis domestica* AOA XP\_003341230.1

*Xenopus tropicalis* AOA XP\_002932838.1

*Gallus gallus* AOB XP\_416766.2

*Monodelphis domestica* AOBL XP\_001377998.2

*Mus musculus* AOB NP\_766366.2

*Bos taurus* AOB NP\_808813.2

*Homo sapiens* AOB NP\_000889.3

*Macaca mulatta* AOB XP\_001096953.1

*Rattus norvegicus* AOB NP\_037330.1

*Danio rerio* AO NP\_997992.2

*Macaca mulatta* AOA XP\_001096840.2

*Xenopus tropicalis* AOAL XP\_002932844.1

*Xenopus tropicalis* MAOA NP\_001120572.1

*Gallus gallus* MAOA NP\_001025970.1  
*Branchiostoma floridae* HYP1 XP\_002593045.1  
*Branchiostoma floridae* HYP2 XP\_002593465.1  
*Branchiostoma floridae* HYP3 XP\_002593164.1  
*Branchiostoma floridae* HYP4 XP\_002601807.1  
*Branchiostoma floridae* HYP5 XP\_002601801.1  
*Danio rerio* AOAL XP\_686310.3  
*Branchiostoma floridae* HYP6 XP\_002593038.1  
*Monosiga brevicollis* HYP1 XP\_001743936.1

## **PNMT**

*Homo sapiens* PNMT NP\_002677.1  
*Macaca mulatta* PNMT XP\_001089850.2  
*Bos taurus* PNMT NP\_803471.2  
*Mus musculus* PNMT NP\_032916.1  
*Rattus norvegicus* PNMT NP\_113714.1  
*Monodelphis domestica* PNMT\_L XP\_001370875.1  
*Gallus gallus* PNMT XP\_003642859.1  
*Xenopus tropicalis* PNMT\_L XP\_002940421.1  
*Danio rerio* PNMT\_L XP\_002666387.1

## **TYR**

*Homo sapiens* TYR\_HS NP\_000363.1  
*Macaca mulatta* TYR\_mam XP\_001105033.1

*Bos taurus* TYR\_BT NP\_851344.1  
*Rattus norvegicus* TYR\_RN NP\_001101005.1  
*Mus musculus* TYR\_mum NP\_035791.1  
*Gallus gallus* TYR\_GG NP\_989491.1  
*Xenopus tropicalis* TYR\_XT NP\_001096518.1  
*Danio rerio* TYR\_DR NP\_571088.1  
*Branchiostoma floridae* HYP1\_BF XP\_002598630.1  
*Branchiostoma floridae* HYP2\_BF XP\_002606901.1  
*Branchiostoma floridae* HYP3\_BF XP\_002606902.1  
*Danio rerio* DCT\_DR NP\_571630.2  
*Homo sapiens* DHICAC\_HS NP\_000541.1  
*Monodelphis domestica* DHICAC\_MD XP\_001372482.1  
*Xenopus tropicalis* DCT\_XT NP\_001017161.1  
*Mus musculus* DCT\_mum NP\_034154.2  
*Bos taurus* DHICAC\_BT NP\_776905.2  
*Rattus norvegicus* DHICAC\_RN NP\_001100134.1  
*Rattus norvegicus* DCTL\_RN XP\_001078239.2  
*Homo sapiens* DCT\_HS NP\_001913.2  
*Danio rerio* DHICAC\_DR NP\_001002749.1  
*Monodelphis domestica* DCTL\_MD XP\_001377636.2  
*Macaca mulatta* DHICAC\_mam XP\_001111475.1  
*Bos taurus* DCT\_BT NP\_001012684.1  
*Macaca mulatta* DCT\_mam XP\_001083129.1  
*Danio rerio* DHICAC2\_DR XP\_002663085.2  
*Mus musculus* DCICAC\_mum NP\_112479.1

*Xenopus tropicalis* TYRL\_XT NP\_001016476.1

*Gallus gallus* DCT\_GG NP\_990266.1

*Gallus gallus* DHICAC\_GG NP\_990376.1

*Branchiostoma floridae* HYP4\_BF XP\_002589597.1

*Xenopus tropicalis* TYRL2\_XT XP\_002941458.1

*Branchiostoma floridae* HYP5\_BF XP\_002592519.1

*Branchiostoma floridae* HYP6\_BF XP\_002597525.1

*Branchiostoma floridae* HYP7\_BF XP\_002589832.1

*Branchiostoma floridae* HYP8\_BF XP\_002587197.1

*Branchiostoma floridae* HYP9\_BF XP\_002604591.1
